# Supplementary material for: Facile synthesis of self-assembled hollow g-C 3 N 4 microtubes for the efficient high-performance photocatalytic degradation of hazardous pollutants under LED light illumination
Source: Royal Society of Chemistry journal article supplement (doi:10.1039/d5cy00820d), 2025-12-19
Supplement: d5cy00820d1.pdf [file d5cy00820d1.pdf]

## Facile Synthesis of Self-Assembled Hollow g-C<sub>3</sub>N<sub>4</sub> Microtubes for Efficient High Performance Photocatalytic Degradation of Hazardous Pollutants under LED Light Illumination

Liza Sarma<sup>1</sup>, Sachi<sup>1</sup>, Pritam Pinaki Biswal<sup>2</sup>, Meganathan Thirumal<sup>1\*</sup>

<sup>1</sup>Department of Chemistry, University of Delhi, Delhi-110007, India

<sup>2</sup>Indian Institute of Technology Delhi, Hauz Khas-110016, New Delhi, India

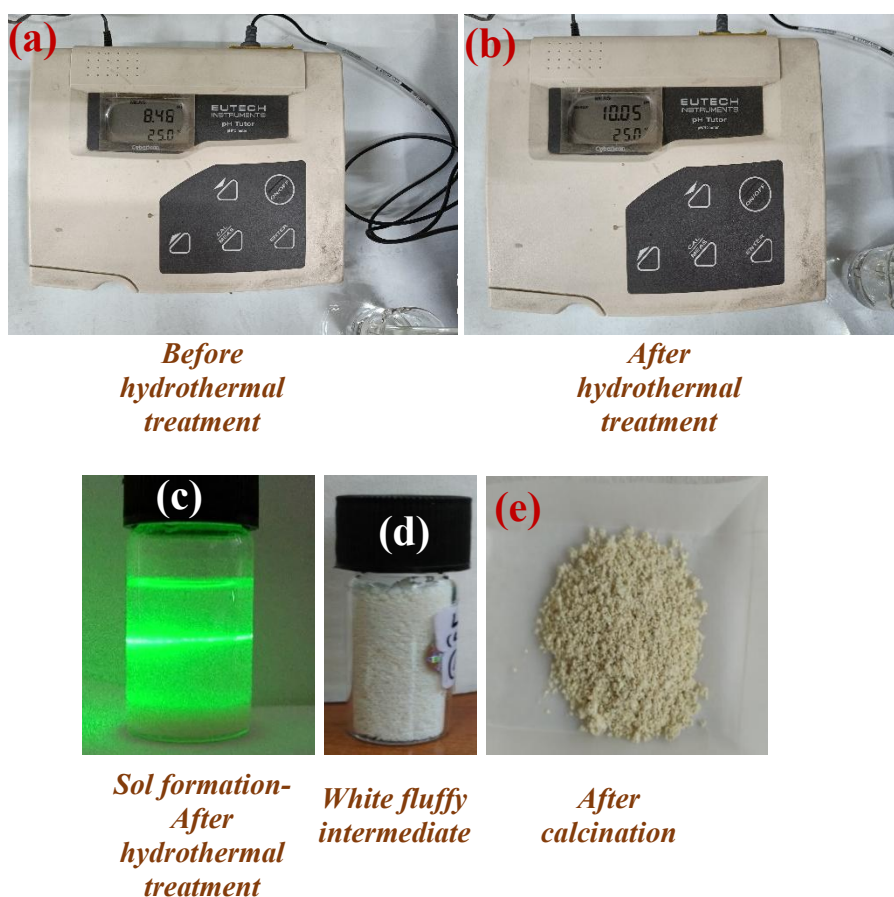

**Figure. S1.** The pH value (a) before and (b) after hydrothermal treatment (c) tailored b-CN solution after hydrothermal reaction (d) white fluffy complex after washing and drying (e) after calcination of white complex.

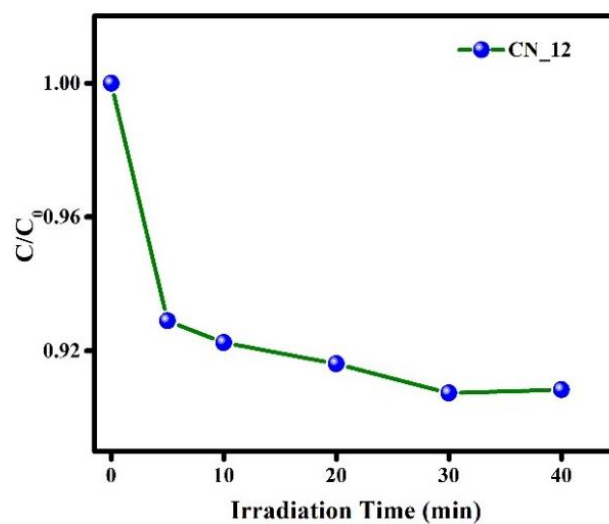

**Figure. S2.** Adsorption equilibrium diagram of the CN\_12 after stirring in the dark condition.

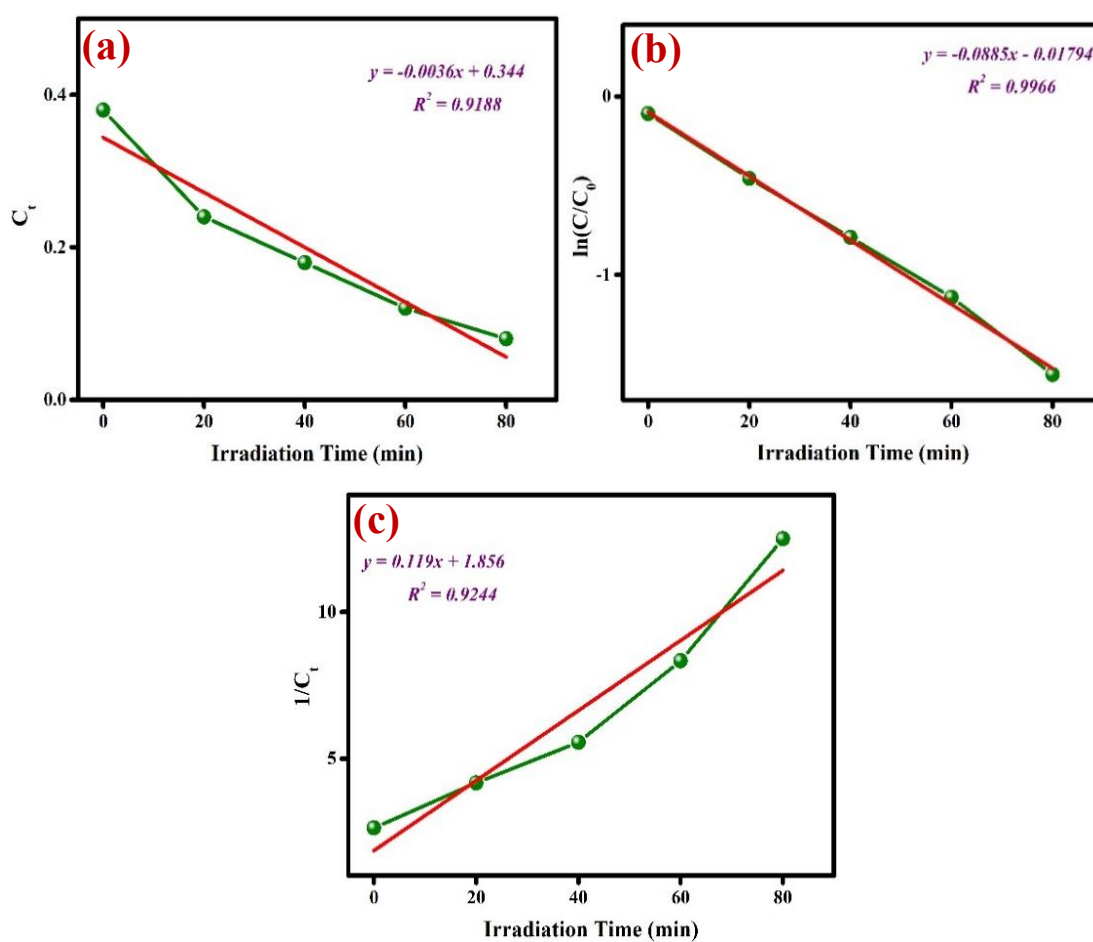

**Figure. S3.** Reaction kinetics of TC degradation for CN\_12 (a) zero (b) first and (c) second order.
